1 **Unraveling the regulatory role of miRNAs responsible for**  
2 **proanthocyanidin biosynthesis in the underutilized legume *Psophocarpus***  
3 ***tetragonolobus* (L.) DC.**

4 **Sagar Prasad Nayak<sup>1,2,\*</sup>, Priti Prasad<sup>1,2,\*</sup>, Vinayak Singh<sup>3</sup>, Abhinandan Mani Tripathi<sup>4</sup>,**  
5 **Sumit Kumar Bag<sup>1,2</sup>, Chandra Sekhar Mohanty<sup>1,2,#</sup>**

6 <sup>1</sup>CSIR-National Botanical Research Institute (CSIR-NBRI), Rana Pratap Marg, Lucknow-226001,  
7 India

8 <sup>2</sup>Academy of Scientific and Innovative Research (AcSIR), Ghaziabad -201002, India

9 <sup>3</sup>Western University, Ontario, Canada

10 <sup>4</sup>Ben-Gurion University of the Negev, Midreshet Ben-Gurion, 8499000, Israel

11

12

13

14

15 \* These authors contributed equally to this work

16

17

18

19

20

21

22

23

24 **#Corresponding author**

25 Chandra Sekhar Mohanty

26 Plant Genetic Resources and Improvement Division,

27 CSIR-National Botanical Research Institute,

28 Lucknow-226 001,

29 Uttar Pradesh,

30 India

31 E-mail: [cs.mohanti@nbri.res.in](mailto:cs.mohanti@nbri.res.in), [sekhar\\_cm2002@rediffmail.com](mailto:sekhar_cm2002@rediffmail.com)

32 Tel. No: (0522)22058937

33 FAX: (0522)22058836

34

35

36 **Word Count**

37

38 Abstract - 200

39

40 Introduction - 1387

41

42 Materials and methods - 1114

43

44 Results - 1337

45

46 Discussion - 1240

47

48 Conclusion - 254

49

50

51

46 **Abstract**

47  
48 The underutilized legume winged bean (*Psophocarpus tetragonolobus* (L.) DC.) is deposited  
49 with various degrees of proanthocyanidin (PA) or condensed tannin (CT) on its seed-coat.  
50 PA content of two different lines of *P. tetragonolobus* was estimated and accordingly they  
51 were denoted as high-proanthocyanidin containing winged bean (HPW) and low-  
52 proanthocyanidin containing winged bean (LPW). The level of PA-content varied as 59.23  
53 mg/g in HPW and 8.68 mg/g in LPW when estimated through vanillin-HCl assay. The  
54 identification and quantification of catechin and epigallocatechin gallate were estimated in a  
55 range of 63.8 mg/g and 2.3mg/g respectively in HPW whereas only epigallocatechin gallate  
56 was reported in LPW line with a value of 3 mg/g. A comparative miRNA profiling of the  
57 leaf-tissues of these contrasting lines of *P. tetragonolobus* revealed a total of 139 mature  
58 miRNAs. Isoforms of known novel miRNAs were also identified in this study. Differentially  
59 expressed miRNAs e.g., miR156, miR396, miR4414b, miR4416c, miR894, miR2111 and  
60 miR5139 were validated through qRT-PCR analysis. Target prediction of the identified  
61 miRNAs especially miR156, miR396, miR4416b shows that they have a potential role in the  
62 proanthocyanidin biosynthesis of *P. tetragonolobus*. The study will provide the basis for  
63 understanding the role of miRNAs in regulating the biosynthesis of proanthocyanidin.

64 **Key words:** Winged bean, Proanthocyanidin, Vanillin HCl assay, High-throughput  
65 sequencing, miRNA, Target Prediction

66

67

68

69

70

71

## 72 **Introduction**

73 Flavonoids are the largest and widely distributed group of secondary metabolites in the plant-  
74 kingdom (Winkel-Shirley, 2001). In addition to provide color, they confer protection to the  
75 plant. They take part in plant growth, development, transport, signaling and many other vital  
76 activities (Koes et al., 2005). More than 6000 different groups of flavonoids with diverse  
77 biological functions have been reported till date (Falcone Ferreyra et al., 2012). Though they  
78 are easily detectable in flowers as pigments, they are widespread in occurrence and are found  
79 in several parts of the plant. They are found across the plant kingdom and through plant-  
80 based foods such as fruits, vegetables and beverages they enter into the food chain (Dewick,  
81 2009). Flavonoids have been divided into various sub-groups like flavones, flavanols,  
82 isoflavones, flavanones and anthocyanins (Panche et al., 2016).

83 Proanthocyanidins (PAs) or condensed tannins (CTs) are the oligomeric flavonoids that  
84 contribute significantly to the dietary polyphenols in the plants (Santos-Buelga and Scalbert,  
85 2000). Almost all parts of the plant including leaves synthesize PA. However, plants deposit  
86 PA preferably on the outer integument of the seeds (Xu et al., 2014). Despite their wide range  
87 of occurrence in different plant parts, they are considered as anti-nutrient because of their  
88 interacting-property with proteins (Duodu and Dowell, 2019). They form complexes with  
89 food proteins and lower the feed-efficiency (Chen et al., 2017; Reddy et al., 1985). As they  
90 possess multiple functional groups, so they can easily make bonds with protein and  
91 carbohydrate molecules (Fraga-Corral et al., 2020). Apart from being an anti-nutrient,  
92 proanthocyanidins also provide beneficial health effects by mitigating inflammation and  
93 oxidative stress (Beecher, 2004) for which it has gained pharmaceutical attentions nowadays.  
94 PA biosynthesis takes place through phenylpropanoid pathway by sequential action of both  
95 early and late biosynthetic genes (Rauf et al., 2019). Involvement of an array of enzymes,  
96 proteins along with the corresponding transcriptional regulators have made this pathway

97 more complex to understand. The synthesis of proanthocyanidin requires the action of a  
98 ternary complex of three different classes of transcription factors viz. R2R3-MYB, bHLH and  
99 WD40 (Li et al., 2018; Li, 2014). These transcription factor complexes activate the  
100 expression of late biosynthetic genes catalyzing the synthesis of downstream compounds.  
101 Genes specific to PA biosynthesis are leucoanthocyanidin reductase (LAR) (Abrahams et al.,  
102 2003), anthocyanidin synthase (ANS) or leucoanthocyanidin dioxygenase (LDOX) and  
103 anthocyanidin reductase (ANR). LAR uses leucocyanidin as a substrate to produce catechin -  
104 the monomeric unit of proanthocyanidin, which further condenses to bioactive PA. In this  
105 process, ANS plays a significant role in the production of colored anthocyanin (He et al.,  
106 2008). ANS oxidizes leucoanthocyanidin to anthocyanidin-precursor molecule for the  
107 biosynthesis of anthocyanin. The remaining anthocyanidins get converted into epicatechin  
108 (monomeric units of PA) through the action of anthocyanidin reductase. This is coded by the  
109 BANYULS gene (Xie et al., 2003). The final condensing enzymes for catalyzing the  
110 polymerization step of PA production are still unknown and the process of condensation is  
111 believed to occur through oxidation. The monomeric units of proanthocyanidin viz. catechin  
112 and epicatechin are synthesized on the cytosolic face of endoplasmic reticulum (Brillouet et  
113 al., 2013), through the action of a multi-enzyme complex (Saslowky and Winkel-Shirley,  
114 2001) and the polymerization takes place inside the chloroplast derived organelle called  
115 “tannosome” (Brillouet et al., 2013). In some plants, the catechin and epicatechin molecules  
116 are galloylated to form the PA, they are linked to many health benefits (Xu et al., 2016).

117 MicroRNAs (miRNAs) are small regulatory RNAs that regulate almost all aspects of plant-  
118 growth and development (Sunkar et al., 2012). The role of miRNAs is well-studied from  
119 cellular-life to stress responses in plants (Alptekin et al., 2016). High-throughput sequencing  
120 and computational analysis facilitated the understanding of miRNAs, especially their  
121 biogenesis, evolution, potential targets and regulatory effect on gene expression (Gupta et al.,

122 2017; Luo et al., 2013). Mature miRNA sequences are of (19-24) nucleotides (Bartel, 2009)  
123 in length having functional role in post-transcriptional gene silencing (Baumberger and  
124 Baulcombe, 2005). It preferably targets the transcription factors (TFs) (Rubio-Somoza and  
125 Weigel, 2011; Sreekumar and Soniya, 2017) like miR156 targets TF SQUAMOSA  
126 PROMOTER BINDING-LIKE (SPL9) and miR172 targets APETALA2 in *Arabidopsis*  
127 (Jangra et al., 2018). Efficient identification of miRNAs in large number of plant species and  
128 elucidation of their functional role in regulating different biological processes in different  
129 life-stages of plants have been performed by many research groups. Efforts have also been  
130 made towards identifying miRNAs involved in phenylpropanoid biosynthetic pathway. In  
131 *Canna*, five miRNA families have been identified to play possible roles in phenylpropanoid  
132 biosynthetic pathway (Roy et al., 2016). It has been reported that, miR858a targets R2R3-  
133 MYB transcription factors to regulate flavonoid biosynthesis in *Arabidopsis* (Sharma et al.,  
134 2016) and miR156 targets squamosa promoter binding like (SPL) proteins for accumulation  
135 of anthocyanin and enhanced levels of flavonols (Gou et al., 2011). Differential expression  
136 of miRNAs in leaf and flower tissues with relations to their flavonoid levels have been  
137 checked in *Osmanthus*. MiRNAs with probable role in flavonoid biosynthesis were detected  
138 (Shi et al., 2021). Moreover, genes associated with glycosylation and insolubilisation of  
139 tannin precursors are the possible targets of dka-miR396g and miR2911 in persimmon fruit  
140 (Luo et al., 2015)

141 Winged bean (*Psophocarpus tetragonolobus* (L.) DC.), is a crop that stands in the category of  
142 underutilized legume despite being a good source of protein and oil (Singh et al., 2017). The  
143 PA content in winged bean varies significantly among the *P.tetragonolobus* cultivars (0.3 to  
144 7.5 mg/g) (Tan et al., 1983). *P. tetragonolobus* was reported to possess soybean equivalent  
145 nutrients (Mohanty et al., 2013) Presence of PA in *P.tetragonolobus* is probably one of the  
146 reasons for its underutilization as it limits the bioavailability of nutrients. Owing to their

147 involvement in various biological processes, miRNAs have been identified, analyzed and  
148 experimentally validated in many leguminous plants including *Phaseolus vulgaris* (Pelaez et  
149 al., 2012), *Cajanus cajan* (Kompelli et al., 2015; Nithin et al., 2017), *Vigna unguiculata* (Gul  
150 et al., 2017), *Caragana intermedia* (Zhu et al., 2013) and *Cicer arietinum* (Hu et al., 2013).  
151 But, till date, there is no report on miRNAs and their associated functions in *P.*  
152 *tetragonolobus*.

153 To systemically identify the miRNAs regulating PA biosynthesis in *P. tetragonolobus*, small  
154 RNA sequencing was carried out in the leaf tissues of two cultivars with contrasting levels of  
155 proanthocyanidin content namely HPW (high proanthocyanidin containing winged bean) and  
156 LPW (low proanthocyanidin containing winged bean). In this study, conserved and novel  
157 differentially expressed miRNAs between the contrasting lines along with their putative  
158 targets were identified. The significant novel miRNAs in *P. tetragonolobus* along with their  
159 secondary structures were predicted. Expression profiling of conserved and novel miRNAs  
160 were also investigated through the qRT-PCR. This study provided an insight into regulatory  
161 network on PA metabolism in winged bean. The proposed network of miRNA-based  
162 regulation of PA biosynthesis and the generated data shall be helpful in future study and  
163 improvement program of *P. tetragonolobus*.

## 164 **Materials and methods**

### 165 **Estimation of proanthocyanidin**

166 Quantification of proanthocyanidin content was carried out through vanillin-HCl assay (Price  
167 et al., 1978). Approximately, 200 mg of *P. tetragonolobus* leaves at an early stage of  
168 lignification was collected and weighed for extraction with 10 ml of methanol. The collected  
169 supernatant was further processed for spectrophotometric analysis at 500 nm with catechin  
170 equivalent standard (CES) (Price et al., 1978). Based on the analysis and screening, diverse  
171 lines with high proanthocyanidin content (HPW) and low-proanthocyanidin content (LPW) of

172 *P. tetragonolobus* were identified for further analysis.

### 173 **Sample preparation, detection and quantification of PA units**

174 Leaves from the field-grown plants were collected and extracted with methanol at  
175 concentration of 1 mg ml<sup>-1</sup>. The supernatant was collected and filtered for HPLC analysis.  
176 For preparation of standards, catechin and epigallocatechin gallate were weighed and  
177 dissolved in methanol and diluted to the required concentrations. The gradient mobile phase  
178 consisting of component A (acetonitrile) and component B (water) was used. The elution of  
179 mobile phase gradient program was as (0–13) min, 21% B; (13–38) min, 36% B; (38–50)  
180 min, 50% B; (50–60) min, 21% B. Constant flow at 1 ml min<sup>-1</sup> was maintained and the  
181 investigated compounds were determined at 254 nm. The standard and sample injection  
182 volume were 20 µl. Each compound was identified with the help of retention time and by  
183 spiking with the standards under the same conditions.

### 184 **RNA isolation, library preparation for sequencing**

185 HPW and LPW lines of *P. tetragonolobus* were grown and maintained in the garden of CSIR-  
186 National Botanical Research Institute, India. Fresh leaf samples were frozen in liquid  
187 nitrogen and total RNA was isolated using mirVana<sup>TM</sup> miRNA isolation kit (Thermo Fisher  
188 Scientific, USA). The NEB next small RNA sample preparation protocol was used to prepare  
189 the sample sequencing library. Illumina adapters in the kit were directly, and specifically,  
190 ligated to miRNAs. The libraries were prepared as per the manufacturer's protocol. RNA 3'  
191 adapter was specifically modified to target miRNAs and other small RNAs that have a 3'-  
192 hydroxyl group resulting from enzymatic cleavage by dicer or other RNA processing  
193 enzymes. The adapters were ligated to each end of the RNA molecule and the reaction was  
194 performed to create single stranded cDNA. The cDNA was then PCR amplified using a  
195 common primer and a primer containing one of the 48 index sequences. After library  
196 preparation, they were sequenced on Illumina HiSeq 2500 platform with 1x50bp read lengths.

## 197 **MiRNA data processing and identification of conserved miRNAs**

198 Raw reads of 50 bp from the HPW and LPW sequenced library were subjected for the  
199 removal of the adapter sequences through the srna workbench toolkit (Stocks et al., 2012).  
200 The filtered reads with a range of 16 to 36 bp length were subjected to blast with the RFAM  
201 database v13 (Kalvari et al., 2018) . This process helped us to remove the small RNAs other  
202 than the miRNAs from both the library, separately. The reads that showed high similarity  
203 with full coverage were excluded and assigned as rRNA, sRNA, tRNA and snoRNA.  
204 Unmapped sequences from the RFAM database were further aligned against to the miRBase  
205 v21 (Kozomara et al., 2019) by mirProf pipeline to identify the known conserved and non-  
206 conserved miRNAs. Default settings were used with the depth of minimum 3 reads and 2  
207 mismatches for miRNAs identification. *Glycine max* was selected as the reference genome  
208 for identification of conserved and known miRNAs, as the genomic information of *P.*  
209 *teragonolobus* is not available in the public domain database till date.

## 210 **Prediction of novel miRNAs and isoforms**

211 Novel miRNAs prediction in the sequenced library was carried out through mirDeep2 tool  
212 (Friedlander et al., 2012). Unmapped reads in both the libraries, were pooled and mapped on  
213 *Glycine max* reference genome by bowtie v1 algorithm (Langmead and Salzberg, 2012). The  
214 sequences of 18 to 25 nucleotide length were selected for defining the novel miRNAs in the  
215 datasets by allowing one mismatch in the seed region with significant randfold *p*-value.  
216 Randfold calculated the minimum folding energy for generating the stable secondary  
217 structure.

218 The isoforms of the conserved miRNAs were also deduced through custom scripts.  
219 Unmapped miRNA reads that showed sequence similarity with *Glycine max* miRNAs with 1  
220 to 7 nt overhangs, were classified as the isoforms of conserved miRNAs. These overhangs  
221 present either at 5' or 3' ends in the pooled datasets.



## 222 **Quantification and differential expression analysis of conserved miRNAs**

223 Identified, conserved miRNAs of HPW and LPW lines of *P. tetragonolobus* were quantified  
224 for the differential expression analysis using DESeq package in R (Anders and Huber, 2010).  
225 Raw mapped counts of identified conserved miRNAs were used as the input for calculation  
226 of differentially expressed miRNAs with FDR value  $\leq 0.05$  and  $\log_2$  (fold change)  $> 1$ . To  
227 understand the functions of known/conserved and differentially expressed miRNAs in  
228 *P.tetragonolobus*, their putative targets were predicted in psRNATarget server, a tool for  
229 plant smallRNA target prediction (Dai et al., 2018). The default parameters for miRNAs  
230 target prediction were used by considering *Glycine max* as a reference genome.

## 231 **Functional enrichment of conserved and novel miRNAs**

232 The putative targets of differentially expressed miRNAs between HPW and LPW lines of *P.*  
233 *tetragonolobus* were visualized through cytoscape (Shannon et al., 2003). Significant Gene  
234 Ontology (GO) enrichment of the identified conserved and novel miRNAs were carried out  
235 through Agri GO software v2 (Tian et al., 2017) with the Singular Enrichment Analysis  
236 (SEA) tool and visualized through ggplot2 library in R-package. The involvement of  
237 identified miRNAs in different secondary metabolic pathways were classified separately  
238 based on mapman pathways database(Thimm et al., 2004).

## 239 **Validation of miRNAs through qRT-PCR**

240 For the real time expression and validation in *P. tetragonolobus*, twelve miRNAs (known and  
241 novel) which were expressed in both the libraries were randomly selected. The corresponding  
242 primers were designed through Primer blast and synthesized from GCC India Private limited  
243 (Supplementary Table 3). A total of 500 ng of RNA were isolated from the leaves of two  
244 diverse lines (HPW and LPW) of *P. tetragonolobus* using SuperScript III Reverse  
245 Transcriptase (Invitrogen, USA). Stem loop cDNAs were synthesized for each miRNA,  
246 individually. The expression levels of all the selected miRNAs were quantified by real time

247 PCR using Applied Biosystems 7500 Fast Real-Time PCR System. Each reaction mixture  
248 contained a total volume of 20  $\mu$ l with 2  $\mu$ l cDNA, 2  $\mu$ l of primers (forward and reverse), 10  
249  $\mu$ l Syber Green PCR Master mix (Thermo fisher Scientific, USA) and 6  $\mu$ l nuclease free  
250 water. Reactions were carried out using three replicates for each sample. For normalization,  
251 the average Ct value of multiple genes were obtained to get the value of  $\Delta$ Ct (Sun et al.,  
252 2015). The fold change value was calculated by  $2^{-\Delta\Delta$ CT method. U6 (RNU6-1) snRNA was  
253 chosen as an internal control for the expression analysis.

## 254 **Results**

### 255 **Estimation of PA and their structural units**

256 The PA content of the leaves of contrasting lines of proanthocyanidin-containing *P.*  
257 *tetragonolobus* (HPW and LPW) was estimated through modified vanillin-HCl assay (Price  
258 et al., 1978). On quantification, the PA content of HPW line of *P. tetragonolobus* was  
259 reported to be 59.23 mg/g while LPW had 8.68 mg/g in the leaf tissues (**Figure 1A**). The PA  
260 content of these two lines displayed a significant difference. Identification and quantification  
261 of different monomeric units of PA (i.e., catechin and epigallocatechin gallate) in the leaf  
262 tissues of HPW and LPW lines of *P. tetragonolobus* was carried out on HPLC platform for  
263 comparative biochemical analysis (**Fig S1**). The identified molecules were calibrated at 280  
264 nm and their levels were quantified in both the lines (**Figure 1B**). The presence of catechin  
265 and epigallocatechin gallate was reported in HPW line with a value of 63.8 mg/g and 2.3mg/g  
266 respectively. The LPW line reported the presence of epigallocatechin gallate in the leaf  
267 tissues with a value of 3 mg/g.

### 268 **Small RNA library preparation and data processing**

269 Small RNA sequencing of HPW and LPW lines of *P.tetragonolobus* was conducted through  
270 Illumina HiSeq 2500 platform that generated an average of ~50 million single-end reads of  
271 50bp length. The generated data is submitted in the public domain database of NCBI with the

272 SRA accession number SRR15115657 to SRR15115660. After the removal of the low-  
273 quality reads, adaptor contaminations and redundancies, approximately five and twelve  
274 million unique filtered reads of 16 to 35 nt lengths were selected in HPW and LPW libraries,  
275 respectively (**Table 1**). The clean reads of both the libraries were mapped to RFAM database  
276 to filter out any contaminated small RNA other than miRNAs including ribosomal RNA  
277 (rRNA), piwi interacting miRNA (piRNA), transfer RNA (tRNA), small interacting RNA  
278 (siRNA), small nucleolar RNA (snoRNA) and small nuclear RNA (snRNA) (**Table S1**). A  
279 total of 2092121 and 1983614 reads in replicate 1 and replicate 2 respectively, of HPW  
280 library were unmapped after the RFAM blast, while 3906027 and 6616015 reads were  
281 unmapped in replicate 1 and replicate 2 respectively, in LPW library (**Table 1**). Length  
282 distribution analysis of the finally filtered reads showed preferred occurrence of 24 nucleotide  
283 long reads (**Figure S2**) in the sequenced libraries. Correlation of replicates of HPW and LPW  
284 library were significantly correlated to each other with r-value of 0.93 and 0.82, respectively  
285 (**Figure S3**).

### 286 **Identification of conserved and differential expressed miRNAs**

287 A total of 32 and 50 conserved miRNA families were identified in HPW and LPW lines of *P.*  
288 *tetragonolobus*, respectively. Thirty-one miRNA families were common to both the libraries  
289 and one being specific to HPW and 19 to LPW (**Figure 2A**). These miRNAs have significant  
290 higher expression in LPW than HPW with the  $p$ -value  $< 0.0001$  (**Figure 2B**). The conserved  
291 miRNA families comprised of total 139 family members whose log<sub>2</sub> expression value was  
292 visualized through the heatmap representation (**Figure S6**). Most of the expressed conserved  
293 miRNAs showed higher expression in LPW line while some miRNAs showed almost equal  
294 level of expression for instance mir2118, mi403, mir5255. All the identified miRNAs showed  
295 their conserveness in 52 different plant lineages (**Figure S4**). Of the identified miRNAs, most  
296 of the miRNAs were found to be present in *Glycine max* in both the HPW (1060 miRNAs)

297 and LPW libraries (1101 miRNAs). This study confirmed that, *Glycine max* and *P.*  
298 *tetragonolobus* are closely related with each other. As compared to HPW sequenced library,  
299 LPW showed much higher number of conserved miRNAs that have been reported in Poaceae.  
300 **(Figure S4).**

301 Among the identified conserved miRNAs, 23 miRNAs were differentially expressed between  
302 the two contrasting lines of *P. tetragonolobus* with  $\log_2$  fc differences  $> \pm 1$ ,  $p$ -value  $< 0.005$   
303 and FDR value  $\leq 0.05$  **(Figure S5)**. In HPW line, five miRNA families (i.e. mir319p,  
304 mir9726, mir862a-b and mir894) were significantly upregulated with fold change  $> 1$   
305 whereas, eight miRNA families (mir4416c-3p, mir396 (a-h, k), mir4414b) were significantly  
306 downregulated **(Table 2)**.

### 307 **Functional enrichment of miRNAs with their putative targets**

308 Differentially expressed (DE) miRNAs in HPW and LPW lines of *P. tetragonolobus* were  
309 subjected to identification of their putative targets in *Glycine max* reference genome with  
310 seed size ranging from 2 to 13 nts, translation inhibition ranged from 10 to 11 nts and  
311 expectation score  $> 3$ . The differentially expressed miRNAs putatively targeted a total of 627  
312 genes (3533 transcripts) **(Figure 3)** in which 555 genes were inhibited by the cleavage  
313 mechanisms while 72 genes were modified by the translation machinery **(Table S2)**.

314 The targeted genes comprised of many transcription factors (TFs) like GRF, MYB, bHLH,  
315 ARF, ERF, SBP TCP, C2H2 **(Figure 3)** **(Table S3)**. These were targeted by cleavage mode  
316 of action. Exceptionally, mir894 inhibits Glyma.13288800 (HD-ZIP) and mir319p inhibits  
317 Glyma.08G188900 (MYB) TFs by translation activity. Secondary metabolite biosynthesis  
318 related genes were also inhibited by the differentially expressed miRNAs **(Figure 3)** **(Table**  
319 **S4)** in which mir4414b targets to dihydroflavonol-4-reductase (DFR, Glyma.17G173200),  
320 mir894 targeted to spermidine hydroxycinnamoyl transferase (SHT, Gyma.08311800,  
321 Glyma.08312000) and 2OG and Fe-dependent oxygenase (Gyma.02G257700). Mir4416c-3p

322 targeted to SHT (Gyma.16G148300) and acyl transferase gene (Gyma.18G029900) while  
323 mir9726 targeted to oxidoreductases gene family (Gyma.17G251400).  
324 Gene ontology analysis of putative targets suggested that they have functional role in  
325 negative regulation of growth (GO:0045926), histone modification (GO:0016570), floral  
326 organ formation (GO:0048449), Ca<sup>2+</sup> transmembrane transport (GO:0070588) and thiamine  
327 pyrophosphate transport (GO:0030974) as well as in hydrolase activity (GO:0004553),  
328 maintaining the anion (GO:0055081) and amino acid homeostasis (GO:0080144) (**Figure**  
329 **4A**). It also has a significant role in leaf morphogenesis (GO:0009965) and leaf development  
330 (GO:0048366).

### 331 **Elucidation of novel miRNA in HPW and LPW lines of *P. tetragonolobus***

332 Identification of novel miRNAs were carried out by unmapped reads that were not assigned  
333 as known and conserved miRNAs in both the lines. A total of 3543844 and 9175080 reads of  
334 HPW and LPW lines respectively were mapped against the *Glycine max* reference genome.  
335 Approximately, 8.658% and 7.571% reads were uniquely mapped in HPW and LPW lines,  
336 respectively. These mapped reads were further used for the identification of novel miRNAs  
337 through mirDeep2 pipeline with significant randfold *p*-value and at least three sequencing  
338 read depth (**Table 3**). MirDeep2 predicted total 19 novel miRNAs in *P.tetragonolobus* in  
339 which five novel miRNAs were predicted from the HPW line while 14 novel miRNAs from  
340 LPW line (**Figure 5 A,B**). These miRNAs were considered as putative novel miRNAs in  
341 *P.tetragonolobus*. Provisional IDs were provided to each putative novel miRNA by taking  
342 “pte-NmiR” as prefix and their putative targets were also predicted (**Table S5**). The gene  
343 ontology (GO) analysis identified the targets of *P.tetragonolobus* novel miRNAs. The GO  
344 analysis suggested their potential role in signal transduction, leaf development and regulation  
345 of chromosome organization along with the epigenetic modifications (**Figure 4B**).  
346 Apart from the novel miRNA predication, isoforms of the conserved miRNAs were also

347 identified. These isoforms were varied in nucleotide length (1 to 7 nts) at either 3' or 5'  
348 overhangs with some nucleotide variation. (**Table 4**). These miRNA isoforms were named  
349 with “pte-IsomiR” prefixes along with their corresponding aligned miRNA ID.

### 350 **Real time expression analysis of the miRNAs in *P.tetragonolobus***

351 Validation of the expressed miRNAs was carried out between the contrasting lines (HPW and  
352 LPW) of *P.tetragonolobus* using stem-loop qRT-PCR. Twelve miRNA families including  
353 two novel miRNAs were randomly selected for validation. Out of the selected miRNAs, ten  
354 miRNAs were validated through qRT-PCR expression analysis. The qRT-PCR based miRNA  
355 expression analysis correlated with the sequenced libraries wherein LPW line showed higher  
356 number of log<sub>2</sub> fold change differences in comparison to HPW line of *P. tetragonolobus*  
357 (**Figure 6**), with exception of miR862b which showed contrasting qPCR results vis-à-vis  
358 deep sequencing result. The two novel miRNAs exhibited same expression as in the  
359 sequencing result between the contrasting lines. Among the known miRNAs mir4416c-5p,  
360 miR2111j, miR156t, miR396, miR4414b, miR894, miR5139 were found to be differentially  
361 expressed and validated on qPCR platform. However, MiR862 exhibited to express at higher  
362 level in HPW line in deep complementing to its higher expression in LPW as validated  
363 through qPCR-based analysis. The primers used for qPCR analysis are listed in  
364 supplementary file (**Table S6**).

### 365 **Discussion**

366 MiRNAs have emerged as the key regulators of numerous biological processes including  
367 secondary metabolite synthesis and their distribution. Among the secondary metabolites,  
368 flavonoids are the important group of secondary metabolites in plants. They provide color  
369 and resistance against various pathogen attack to the plants. The flavonoid biosynthesis has  
370 been widely studied in many plants and the pathway operates in almost every fruit and

371 vegetables and thus become a part of our regular diet (Tohge et al., 2017). Proanthocyanidins  
372 belong to flavonoid class of secondary metabolites and their biosynthesis and genetic  
373 regulation mechanism is yet to get fully explored. There are no reports till date regarding the  
374 miRNAs responsible for the biosynthesis of proanthocyanidins in *P. tetragonolobus*. This is  
375 the first attempt to report the responsible miRNAs for biosynthesis of proanthocyanidin in  
376 this underutilized legume *P. tetragonolobus*. Understanding the molecular basis of PA  
377 biosynthesis would help to manipulate its biosynthesis in legumes. This may pave way for  
378 altering the biosynthesis of PA.

379 The presence of different monomeric subunits of PA (catechin and epigallocatechin gallate)  
380 in varying levels in HPW and LPW lines of *P. tetragonolobus* suggests that, the PA level is  
381 possibly being regulated at different genetic levels. As leaf is one of the primary sites of  
382 secondary metabolite biosynthesis, so the miRNA analysis of leaves will be helpful for  
383 understanding the mechanism of PA biosynthesis and its further regulation. MiRNAs have  
384 already been identified to take part in various developmental processes including secondary  
385 metabolite synthesis e.g., miR858 & miR156 in flavonoid synthesis pathway and miRNA &  
386 miR414 & miR1134 in terpenoid biosynthesis(Gupta et al., 2017). High-throughput  
387 sequencing has enabled identification and deposition of miRNAs in miRbase. This enables  
388 database the process of identifying miRNAs in new plant species has become more accurate  
389 (Sripathi et al., 2018).

390 In the present study, approximately 50 million Illumina reads were sequenced and analyzed.  
391 This leads to the identification of 32 and 50 miRNA families in HPW and LPW lines  
392 respectively. The size distribution of the filtered reads showed the occurrence of 24nt small  
393 RNAs in both the lines. This result is consistent with the previously reported sRNA data in  
394 *Asparagus officinalis* (Chen et al., 2016), *Medicago truncatula* (Szittyta et al., 2008) and  
395 *Citrus trifoliata* (Song et al., 2010). The fully sequenced and annotated *Glycine max* genome

396 enabled to identify the conserved and novel miRNAs with their putative targets in *P.*  
397 *tetragonolobus*. *G. max* is a model legume and showed higher number of conserved miRNAs  
398 in the generated sequenced data of both the lines of *P. tetragonolobus*. The miRNAs  
399 identified through homology-based methods had revealed some highly conserved and non-  
400 conserved miRNA families in wide range of plants. The highly-conserved miRNA families  
401 include miR156, miR396, miR157, miR319 (Zhang et al., 2006) that are involved in many  
402 vital biological processes of plant growth and development. MiR4414, miR4416, miR5037,  
403 miR2111, miR9726 and miR894 are the miRNA families whose functions are yet to be  
404 elucidated. MiR156, miR396, miR4414b, miR408 were reported to be differentially  
405 expressed in HPW and LPW lines and some novel miRNAs were too found to be  
406 differentially expressed in the contrasting lines of *P. tetragonolobus*.

407 Most of the miRNA families were found to be highly expressed in LPW than HPW lines of  
408 *P. tetragonolobus*. Out of the differentially expressed miRNAs, miR4414b, miR4414c,  
409 miR396, miR156, and miR894 have some direct or indirect control over proanthocyanidin  
410 biosynthesis (Gou et al., 2011; Gupta et al., 2017; Wang et al., 2020). MiR156 interacts with  
411 *SQUAMOSA PROMOTER BINDING PROTEIN-LIKE (SPL)* gene to increase the levels of  
412 anthocyanins and regulate the levels of other associated products like flavones and flavanols.  
413 *SPL* genes have been found to be negative regulators of flavonoid biosynthetic pathway as  
414 they disrupt MYB-bHLH-WD40 ternary complex which act as activators of late biosynthetic  
415 genes. Thus, SPL9 affects the accumulation of anthocyanin and downstream compounds  
416 (Gou et al., 2011; Wang et al., 2020). Differential expression of miR156 suggests its possible  
417 role in the regulation of proanthocyanidin synthesis in *P. tetragonolobus*. Dihydroflavonol  
418 reductase (*DFR*) gene was also found to be targeted by the miR4414b, which was found to be  
419 differentially expressed and also has been validated. DFR is one of the key regulatory-  
420 enzymes of the flavonoid biosynthetic pathway that is essential for proanthocyanidin



421 synthesis and accumulation (Li et al., 2017). Higher level of expression of miR441b in LPW  
422 line suggests its possible role in lowering the PA level in LPW leaves. Higher expression of  
423 differentially expressed miR396 negatively regulates flavonoid synthesis targeting the *GRF8*  
424 gene, a positive regulator of flavanone-3-hydroxylase (*F3H*) gene (Dai et al., 2019) of the  
425 pathway. Moreover, target prediction shows UDP-glucosyl transferase which glycosylates  
426 anthocyanidin is targeted by miR396 and the glycosylation step usually leads to the  
427 production of various anthocyanin pigments (Zhao et al., 2012) and the unused  
428 anthocyanidins are directed for prepectchin (monomeric unit of PA) formation by the activity  
429 of anthocyanidin reductase enzyme (He et al., 2008). UDP-glycosyl transferase is a large  
430 gene family having different roles; one being involved in secondary metabolite synthesis.  
431 UGT78D2 that was predicted to be one of the targets of miR396 encodes for flavonoid 3-O-  
432 glucosyltransferase, this catalyzes the glucosylation of both flavonols (quercetin) (Kim et al.,  
433 2012) and anthocyanidins at the 3-OH position (Pourcel et al., 2010). Moreover,  
434 overexpression of UDP-glycosyl transferase gene produces higher amounts of anthocyanin  
435 and proanthocyanidin (Rao et al., 2019). Differential expression of miR396 may be correlated  
436 with the PA synthesis. MiR396 is functionally validated with its predicted target i.e., UDP-  
437 glucosyl transferase (*UGFT*) gene, the foresaid hypothesis can be a major lead in this study.  
438 Other miRNAs which have been identified with their targets playing role in PA synthesis are  
439 miR4414b, miR4414c and miR894. They have differential expression pattern in HPW and  
440 LPW lines of *P. tetragonolobus*, suggesting their probable role in PA biosynthesis. A putative  
441 model has been illustrated from the high throughput sequencing analysis of two contrasting  
442 lines to highlight the probable role of miRNAs in proanthocyanidin biosynthesis in *P.*  
443 *tetragonolobus* (**Figure 7**).

444

445

## 446 **Conclusion**

447 Two different lines of *P.tetragonolobus* were scrutinized through biochemical assays and  
448 termed as HPW and LPW lines. Various genes, transcription factors and enzymes related to  
449 the subsequent pathways of PA biogenesis were targeted by expressed miRNAs in the  
450 contrasting PA-containing lines. HPW line has low expression value of most of the miRNAs  
451 both in deep sequencing and qPCR. Flavonoid synthesis pathway is a complex network of  
452 sequential actions of enzymes and transcription factors. This leads to the synthesis of many  
453 important compounds (Vogt, 2010) including proanthocyanidin which is the focus of this  
454 study. miRNAs have emerged as the key modulators of gene expression and have been found  
455 to play a role in this pathway. In our study apart from the previously characterized miRNAs,  
456 certain conserved and non-conserved and novel miRNAs with potential targets in the  
457 pathway have been identified, indicating the clue for the molecular mechanism of PA  
458 metabolism in *P. tetragonolobus*. However, further experimental validation of the miRNAs  
459 and their targets can reveal the exact mechanism through which miRNAs take part in PA  
460 synthesis in *P.tetragonolobus*. Most of the miRNAs in the proanthocyanidin biosynthesis  
461 were upregulated in LPW library, which supports the higher level of proanthocyanidin  
462 production in HPW as compared to LPW. This work provides an information regarding the  
463 known and novel *Psophocarpus tetragonolobus* miRNAs, their targets and their possible role  
464 in PA metabolism. Further, *in vitro* characterization and validation of the identified conserved  
465 and novel miRNAs might provide an important clue to regulation of PA synthesis and  
466 accumulation in winged bean.

467

468

469

470

471 **Acknowledgement:**

472 CSM and SPN acknowledge Dept. of Biotechnology for the financial support to carry out this  
473 activity and Director, CSIR-NBRI for providing the infrastructure facility. We also  
474 acknowledge NBPGR for providing required germplasm. PP and SPN acknowledge  
475 University Grants Commission for research fellowship grant. Authors also acknowledge Kirti  
476 Pandey and Arpit Chauhan for providing the experimental support during the study.

477 **Author's contribution**

478 CSM and SPN designed the research work. SPN conducted most of the experiments and  
479 prepared sample for small RNA sequencing. PP performed all the bioinformatic analyses.  
480 SPN and PP wrote the manuscript. VS and AMT provided necessary suggestions in  
481 conducting experiments. CSM, VS and SB helped in finalizing the manuscript and critically  
482 assessed the report. All authors read and approved the manuscript.

483 **Conflict of Interest**

484 Authors declare no conflict of interest

485

486

487

488

489

490

491

492

493

494

495

496 **Figure Legends**

497 **Figure 1 A.** Proanthocyanidin (PA) composition in leaf tissues of two selected lines of  
498 *P.tetragonolobus*. PA content was measured in mg/g of leaf tissues. Higher PA content line  
499 was referred as a High Proanthocyanidin Winged bean containing Line (HPW) whereas Low  
500 PA content line was referred as a Low Proanthocyanidin Winged bean containing Line  
501 (LPW) **B.** Qualitative and quantitative analysis of monomeric units of proanthocyanidin in  
502 methanolic extracts of leaf tissues in two contrasting lines (HPW and LPW) of *P.*  
503 *tetragonolobus* using HPLC method.

504

505 **Figure 2 A.** Identified conserved miRNAs in our sequenced library of two PA containing  
506 lines. Larger circle size represents the higher number of conserved miRNAs in LPW line  
507 while HPW has comparatively lower number of conserved miRNAs. **B.** Box plot  
508 representation of normalized expression value of conserved miRNAs in HPW and LPW lines.  
509 miRNAs expression level differences between two diverse lines are statistically significant  
510 (two sample t-test) with the p-Value 0.00015.

511

512 **Figure 3** Target visualization of Differentially Expressed (DE) miRNAs in HPW and LPW  
513 lines of *P. tetragonolobus* for **A.** mir894 **B.** mir319p **C.** mir4414b **D.** mir862a **E.** mir9726 **F.**  
514 mir396 **G.** mir4416-c3p and **H.** mir396-5p. Diamond shaped pink color (node) represents the  
515 DE miRNAs and the targets were represented in edges with turquoise colored *Glycine max*  
516 Gene ID. Transcription Factors were displayed through the brown rectangular boxes, while  
517 secondary metabolites related genes were showed in pink colored boxes. The yellow colored  
518 edges are the literature based validated targets of the corresponding miRNA.

519

520 **Figure 4** Gene ontology enrichment analyses of predicted targets of **A.** Differentially  
521 expressed conserved miRNAs and **B.** Novel miRNAs. The X-axis represents the rich factor  
522 (total number of genes/background genes) and Y-axis depicted the different GO Term. Dots  
523 were used for representing the total number of genes present in input datasets and color code  
524 represents their significant enrichment. All selected GO term are significant with the FDR  
525 Value less than 0.005.

526

527 **Figure 5** Secondary structure illustrations of predicted Novel miRNAs of *P. tetragonolobus*  
528 from the **A.** HPW and **B.** HPW sequenced Illumina library. Provisional Id was given to each

529 predicted novel miRNAs in sequential manner with “pte-NmiR” prefixes. Star nucleotide  
530 sequences in miRNA secondary structures were represented in red in color.

531

532 **Figure 6** Real time Expression analyses of conserved and novel miRNAs in two contrasting  
533 lines (HPW and LPW) of *P.tetragonolobus*. The relative expression levels of the selected  
534 miRNAs were calculated using the  $2^{-\Delta\Delta CT}$  method. The U6 gene was used as a Control.  
535 Each experiment consisted of three replicates and the error bars represent the standard  
536 deviation of the mean expression values among the replicates. Novel miRNAs were enclosed  
537 in red box.

538

539 **Figure 7** A putative model that illustrates the role of miRNAs in different proanthocyanidin  
540 content in the two contrasting line of *P. tetragonolobus*. Continuous arrow lines displayed the  
541 known pathways while break arrow showed the some missing pathway link. Red stop lines  
542 indicate the putative targets of the expressed miRNAs in the two sequenced library. The  
543 expressed miRNAs that hindering the flavonoid pathway are written in purple font color and  
544 their expression value was represented through the heatmap with the coloring scale ranging  
545 from 1 to 14. Left side and Right side expression bar was used for HPW and LPW library,  
546 respectively.

547

548 **Figure S1** HPLC Chromatogram of standards (catechin and epigallocatechin gallate) and  
549 methanol extracts of *P. tetragonolobus* leaves.

550

551 **Figure S2** Nucleotides variation length of small mRNA in the sequenced library of HPW and  
552 LPW of *P. tetragonolobus*.

553

554 **Figure S3** Correlation plot between the replicate 1 and replicate 2 of Illumina sequenced  
555 HPW and LPW library. R value represents the correlation value of 0.93 and 0.82 in HPW and  
556 LPW library, respectively with the significant p value  $< 2.2e-16$ .

557

558 **Figure S4** Different number of identified conserved miRNAs in HPW and LPW library in 52  
559 plant lineages. X-axis represented the different plant species while different numbers of  
560 miRNAs was scaled in Y-axis. Bold font scientific name was used for plant species that  
561 belongs to Poaceae family.

562

563 **Figure S5** Volcano plot to represents the differentially expressed miRNAs between the HPW  
564 and LPW lines of *P. tetragonolobus*. X-axis was used for the log<sub>2</sub>Foldchange whereas Y-axis  
565 representing the  $-\log_2(\text{pValue})$ . Each dots describe the expressed miRNAs; wherein red dots  
566 define the differentially expressed miRNAs.

567

568 **Figure S6** Heat map visualizations of log<sub>2</sub>fold change expression value of miRNAs from the  
569 High Proanthocyanidin Winged bean containing Line and Low Proanthocyanidin Winged  
570 bean containing Line. Lower expression value was represented in the red in color while  
571 higher expression was illustrated with green color. The color scale was ranged from 1 to 14.

572

573 **Table 1** Mapping statistics of High Proanthocyanidin Winged bean containing Line (HPW)  
574 and Low Proanthocyanidin Winged bean containing Line (LPW) of *P. tetragonolobus* along  
575 with their two biological replicates.

576

577 **Table 2** Mean expression value of differentially expressed miRNAs along with their log<sub>2</sub>fold  
578 change differences, pValue and FDR value. Green and red colored cell was used for  
579 upregulated and downregulated miRNAs in HPW line in compare to LPW line.

580

581 **Table 3** Detail information of predicted novel miRNAs in *P. tetragonolobus*. The provisional  
582 ID were given to all predicted novel miRNAs by adding “pte-NmiR” prefixes. Precursors  
583 coordinate of each miRNAs were mentioned along with their orientation on the genomic  
584 strand.

585

586 **Table 4** Identified miRNAs isoforms of *P. tetragonolobus* on the basis of *Glycine max*  
587 reference genome. All isoforms showed the nucleotides (nt) overhangs either at 5' or 3'  
588 marked with the red bold font letter. Blue font letter was used to displayed some nucleotide  
589 variation in the miRNA sequences.

590

591

592

593

594

595

596

**Table 1**

| <b>Samples</b> | <b>Raw Reads</b> |                 | <b>After Filtration</b><br>(Q Value > 30 && adaptor) |                 | <b>16-35 nt</b><br>(length) |                 | <b>RFAM</b>   |                 |
|----------------|------------------|-----------------|------------------------------------------------------|-----------------|-----------------------------|-----------------|---------------|-----------------|
|                | <b>Total</b>     | <b>Distinct</b> | <b>Total</b>                                         | <b>Distinct</b> | <b>Total</b>                | <b>Distinct</b> | <b>Mapped</b> | <b>Unmapped</b> |
| HPW_R1         | 45374213         | 4291092         | 38756906                                             | 3352329         | 20613214                    | 2613885         | 521764        | 2092121         |
| HPW_R2         | 40713622         | 3660218         | 33564423                                             | 2987992         | 15382959                    | 2455551         | 471937        | 1983614         |
| LPW_R1         | 47526600         | 6212028         | 45188452                                             | 5399167         | 26313706                    | 4579360         | 673333        | 3906027         |
| LPW_R2         | 66054417         | 10038596        | 61240301                                             | 8702929         | 37258688                    | 7426258         | 810243        | 6616015         |

**Table 2**

| <b>Conserved miRNAs</b> | <b>baseMean</b> | <b>log2fc (HPW/LPW)</b> | <b>pvalue</b> | <b>padj (FDR)</b> |
|-------------------------|-----------------|-------------------------|---------------|-------------------|
| mir319p                 | 12.43554        | 5.91274                 | 0.000185      | 0.009224          |
| mir9726                 | 112.2142        | 3.357041                | 4.64E-07      | 8.95E-05          |
| mir862b                 | 25.40438        | 2.966671                | 0.006805      | 0.059702          |
| mir862a                 | 48.02233        | 2.640391                | 0.007153      | 0.060024          |
| mir894                  | 1323.504        | 1.758635                | 0.000858      | 0.009744          |
| mir4416c-3p             | 1352.312        | -1.56479                | 0.003223      | 0.031103          |
| mir396d                 | 6029.462        | -1.71521                | 0.002443      | 0.024811          |
| mir396e                 | 5959.449        | -1.78419                | 0.001727      | 0.018513          |
| mir396c                 | 5734.998        | -1.92897                | 0.000765      | 0.009224          |
| mir396                  | 5730.927        | -1.9335                 | 0.000751      | 0.009224          |
| mir396b                 | 5730.927        | -1.9335                 | 0.000751      | 0.009224          |
| mir396f                 | 5730.927        | -1.9335                 | 0.000751      | 0.009224          |
| mir396g                 | 5730.927        | -1.9335                 | 0.000751      | 0.009224          |
| mir396h                 | 5730.927        | -1.9335                 | 0.000751      | 0.009224          |
| mir396a                 | 5731.028        | -1.93353                | 0.00075       | 0.009224          |
| mir396-5p               | 5730.927        | -1.9335                 | 0.000751      | 0.009224          |
| mir396a-5p              | 5730.927        | -1.9335                 | 0.000751      | 0.009224          |
| mir396b-5p              | 5730.927        | -1.9335                 | 0.000751      | 0.009224          |
| mir396c-5p              | 5730.927        | -1.9335                 | 0.000751      | 0.009224          |
| mir396e-5p              | 5730.927        | -1.9335                 | 0.000751      | 0.009224          |
| mir396f-5p              | 5730.927        | -1.9335                 | 0.000751      | 0.009224          |
| mir396k-5p              | 5730.927        | -1.9335                 | 0.000751      | 0.009224          |
| mir4414b                | 11.87616        | -5.46743                | 0.004171      | 0.038337          |



**Table 3**

| Samples | Provisional ID | Total Read Count | Mature Read Count | Star Read Count | Mature sequence          | Star sequence             | Precursors Coordinate | Strand |
|---------|----------------|------------------|-------------------|-----------------|--------------------------|---------------------------|-----------------------|--------|
| HPW     | Pte_mir1       | 20               | 16                | 8               | agcagucaugggcaugguca     | aguggcuugguuaagggaaacca   | 14:17412811:17412893  | +      |
|         | Pte_mir2       | 24               | 17                | 7               | cauaguuacacugauagag      | cuaaaugaugaaaacuguc       | 7:18591265-18591339   | +      |
|         | Pte_mir3       | 24               | 17                | 7               | cauaguuacacugauagag      | cuaaaugaugaaaacuguc       | 16:19029519-19029593  | +      |
|         | Pte_mir4       | 7                | 7                 | 0               | uuuggauugaagguagcucgc    | aagcugauaacuucauucagaag   | 1:31965242-31965292   | +      |
|         | Pte_mir5       | 52               | 52                | 0               | aaacaaagguuaaagaauaaaaga | uuuuauucuuuaaccuuaucaacu  | 3:33679635-33679688   | +      |
| LPW     | Pte_mir6       | 57               | 57                | 0               | guaguauauggcgggcggg      | agaccgguacuauaga          | 18:31164195-31164232  | -      |
|         | Pte_mir7       | 30               | 29                | 1               | uucggccguuccaugggcucuc   | agagcucauuucacccggcca     | 15:3309131-3309192    | +      |
|         | Pte_mir8       | 23               | 23                | 0               | caccuauuuagcuauu         | uggugcuuucuaugaugaugug    | 16:30911686-30911753  | +      |
|         | Pte_mir9       | 22               | 22                | 0               | caacuuaacaacggauca       | aaccgguguugaaucaacuguuguu | 9:11993815-11993869   | -      |
|         | Pte_mir10      | 37               | 36                | 1               | uagauagagagcugucaguu     | aaagauaacuguuaguuu        | 16:25677282:25677360  | -      |
|         | Pte_mir11      | 15               | 15                | 0               | guaaaugauggaacauaug      | ugugguuccgcaugccacca      | 4:28974470-28974530   | +      |
|         | Pte_mir12      | 14               | 14                | 0               | uuugcuguugaguugacaca     | uucuugacucaacuggcrauagg   | 3:14238882-14238944   | +      |
|         | Pte_mir13      | 13               | 13                | 0               | agaugucuuugaguguugcua    | ccaacaauuaugggaaaagucuu   | 7:13634478-13634552   | -      |
|         | Pte_mir14      | 12               | 12                | 0               | uuuggauugaagguagcu       | cugauaacuucacuucagaag     | 1:31965242-31965292   | +      |
|         | Pte_mir15      | 12               | 12                | 0               | gacagaaagagaagugagca     | cucacucucuucugucuaa       | 4:5047205-5047286     | +      |
|         | Pte_mir16      | 12               | 12                | 0               | gacagaaagagaagugagca     | cucacucucuucugucuaa       | 6:4705091-4705173     | +      |
|         | Pte_mir17      | 6                | 6                 | 0               | auucaagauagcugugag       | uagaguauauuuuugaauug      | 8:14489528-14489571   | +      |
|         | Pte_mir18      | 3                | 1                 | 2               | uaguugauggugaugauagc     | acaugacgacaacaauaguu      | 10:4752218-4752278    | -      |
|         | Pte_mir19      | 3                | 2                 | 1               | uguuguuguugucgucauugc    | aguggcaauuacaauagag       | 15:51035155-51035239  | -      |

**Table 4**

| <b>Isoform miRNA</b> | <b>Sequences</b>                                  | <b>Length</b> |
|----------------------|---------------------------------------------------|---------------|
| gma-miR1510b-5p      | AGGGATAGGTAAAACA <b>ACTACT</b>                    | 22            |
| pte-IsomiR1510b-5p   | <b>G</b> AGGGATAGGTAAAACAAC                       | 19            |
| gma-miR1514a-3p      | ATGCCTATTTTAAAATGAAAA                             | 21            |
| pte-IsomiR1514a-3p   | ATGCCTATTTTAAAATGAAAA <b>CA</b>                   | 23            |
| gma-miR159c          | <b>A</b> TTGGAGTGAAGGGAGCT <b>CCG</b>             | 21            |
| pte-IsomiR159c       | <b>ATT</b> GGAGTGAAGGGAGCT <b>CTG</b>             | 22            |
| gma-miR164a          | TGGAGAAGCAGGGCACGT <b>GCA</b>                     | 21            |
| pte-IsomiR164a       | <b>T</b> TGGAGAAGCAGGGCACGTGC                     | 21            |
|                      | <b>CT</b> GGAGAAGCAGGGCACGTGC                     | 21            |
| gma-miR164b          | TGGAGAAGCAGGGCACGTGC                              | 20            |
| pte-IsomiR164b       | <b>T</b> TGGAGAAGCAGGGCACGT <b>GCA</b>            | 22            |
|                      | TGGAGAAGCAGGGCACGT <b>GCA</b>                     | 21            |
| gma-miR166h-5p       | GGAATGTTGT <b>T</b> TGGCTCGAGG                    | 21            |
| pte-IsomiR166h-5p    | GGAATGTTGT <b>CT</b> GGCTCGAG <b>G</b> A          | 22            |
| gma-miR166l          | GGAATGTTGTCTGGCTCGAGG                             | 21            |
| pte-IsomiR166l       | GGAATGTTGGCTGGCTCGAG <b>G</b> C                   | 22            |
| gma-miR167e          | TGAAGCTGCCAGC <b>A</b> TGATCTT                    | 21            |
| pte-IsomiR167e       | TGAAGCTGCCAGC <b>CT</b> GATCT <b>T</b> A          | 22            |
| gma-miR171r          | CGAGCCGAATCAATA <b>CC</b> ACTC                    | 21            |
| pte-IsomiR171r       | <b>AG</b> ACGAGCCGAATCAATA <b>TC</b> ACT <b>T</b> | 25            |
|                      | CGAGCCGAATCAATA <b>TC</b> ACT <b>T</b>            | 22            |
| gma-miR2111b         | TAATCTGCATCCTGAGG <b>T</b> TA                     | 21            |
| pte-IsomiR2111b      | TAATCTGCATCCTGAGG <b>TT</b> <b>A</b> <b>G</b>     | 22            |
|                      | <b>T</b> TAATCTGCATCCTGAGG <b>T</b> <b>G</b> T    | 21            |
|                      | <b>G</b> TAAATCTGCATCCTGAGG <b>T</b> T            | 21            |
| gma-miR319n          | <b>TT</b> TGGACCGAAGGGAGCCCCT                     | 21            |
| pte-IsomiR319n       | TGGACCGAAGGGAGCCC <b>T</b> <b>T</b> <b>C</b> T    | 22            |

|                   |                                          |    |
|-------------------|------------------------------------------|----|
| gma-miR319p       | <b>TTT</b> TGGACTGAAGGGAGCTCC            | 21 |
| pte-IsomiR319p    | TGGACTGAAGGGAGCTCC <b>TTCT</b>           | 22 |
|                   | <b>TT</b> TGGACTGAAGGGAGCTCC <b>TACT</b> | 23 |
|                   |                                          |    |
| gma-miR390a-3p    | CGCTATCCATCCTGAGTT <b>TC</b>             | 20 |
| pte-IsomiR390a-3p | <b>G</b> CGCTATCCATCCTGAGTT              | 19 |
|                   | CGCTATCCATCCTGAGTT <b>TCA</b>            | 21 |
|                   |                                          |    |
| gma-miR393c-5p    | TCCAAAGGGATCGCATTGATCC <b>C</b>          | 22 |
| pte-IsomiR393c-5p | <b>GT</b> TCCAAAGGGATCGCATTGAT <b>CT</b> | 24 |
|                   |                                          |    |
| gma-miR394a-5p    | TTGGCATTCTGTCCACCTCC                     | 20 |
| pte-IsomiR394a-5p | <b>TTT</b> TGGCATTCTGTCCACCTCC           | 22 |
|                   |                                          |    |
| gma-miR396h       | TCCACAGCTTTCTTGA <b>ACTG</b>             | 20 |
| pte-IsomiR396h    | <b>TT</b> TCCACAGCTTTCTTGA <b>ACTT</b>   | 21 |
|                   |                                          |    |
| gma-miR399c       | TGCCAAAGGAGAGTTGCCCTG                    | 21 |
| pte-IsomiR399c    | <b>C</b> TGCCAAAGGAGAATTGCCCTG           | 22 |
|                   |                                          |    |
| gma-miR399i       | TGCCAAAGGAGAATTGCCCTG                    | 21 |
| pte-IsomiR399i    | TGCCAAAGGAGAATTG <b>TCCTGC</b>           | 22 |
|                   | TGCCAAAGGAGAGTTGCCCTG <b>TTG</b>         | 24 |

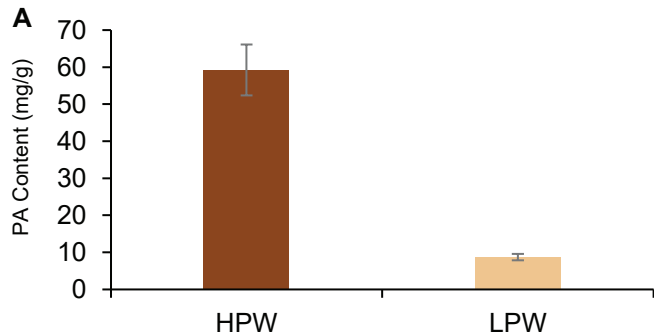

**B**

| Monomeric Units of PA    | HPW  | LPW |
|--------------------------|------|-----|
| Catechin                 | 63.8 | -   |
| Epigallocatechin gallate | 2.3  | 3.0 |

**Fig.1 A.** Proanthocyanidin (PA) composition in leaf tissues of two selected lines of *P. tetragonolobus*. PA content was measured in mg/g of leaf tissues. Higher PA content line was referred as a High Proanthocyanidin Winged bean containing Line (HPW) whereas Low PA content line was referred as a Low Proanthocyanidin Winged bean containing Line (LPW) **B.** Qualitative and quantitative analysis of monomeric units of proanthocyanidin in methanolic extracts of leaf tissues in two contrasting lines (HPW and LPW) of *P. tetragonolobus* using HPLC method.

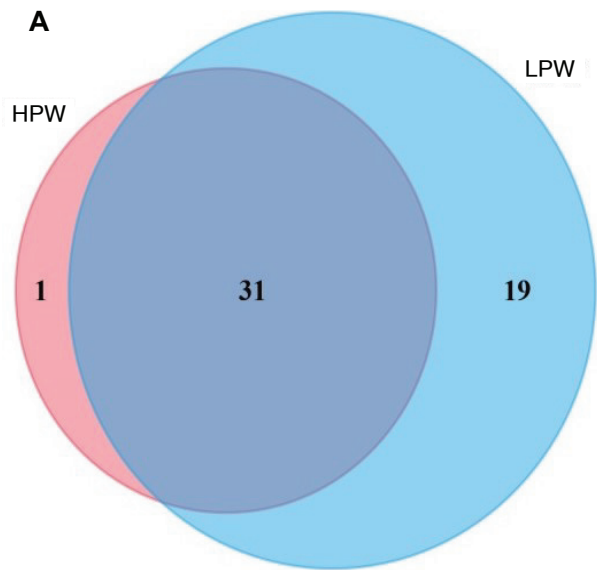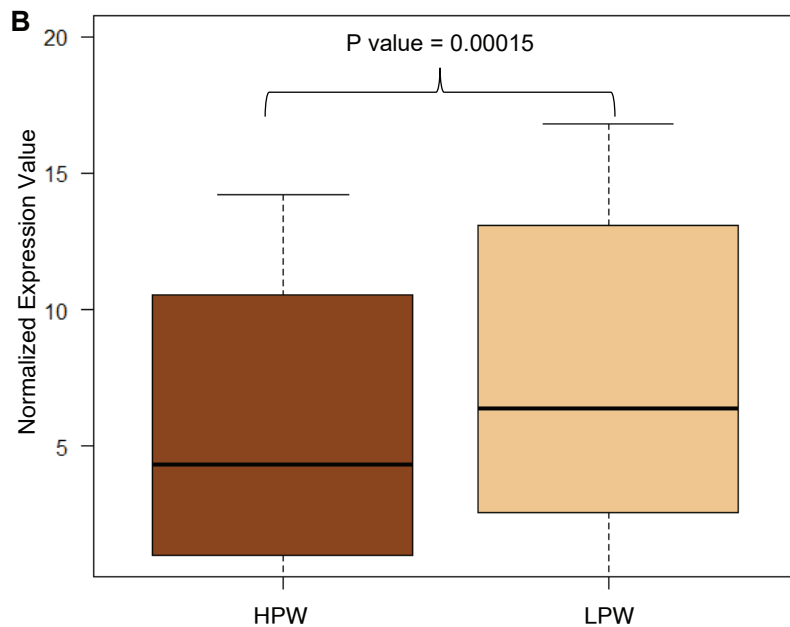

**Fig. 2 A.** Identified conserved miRNAs in our sequenced library of two PA containing lines. Larger circle size represents the higher number of conserved miRNAs in LPW line while HPW has comparatively lower number of conserved miRNAs. **B.** Box plot representation of normalized expression value of conserved miRNAs in HPW and LPW lines. miRNAs expression level differences between two diverse lines are statistically significant (two sample t-test) with the p-Value 0.00015.

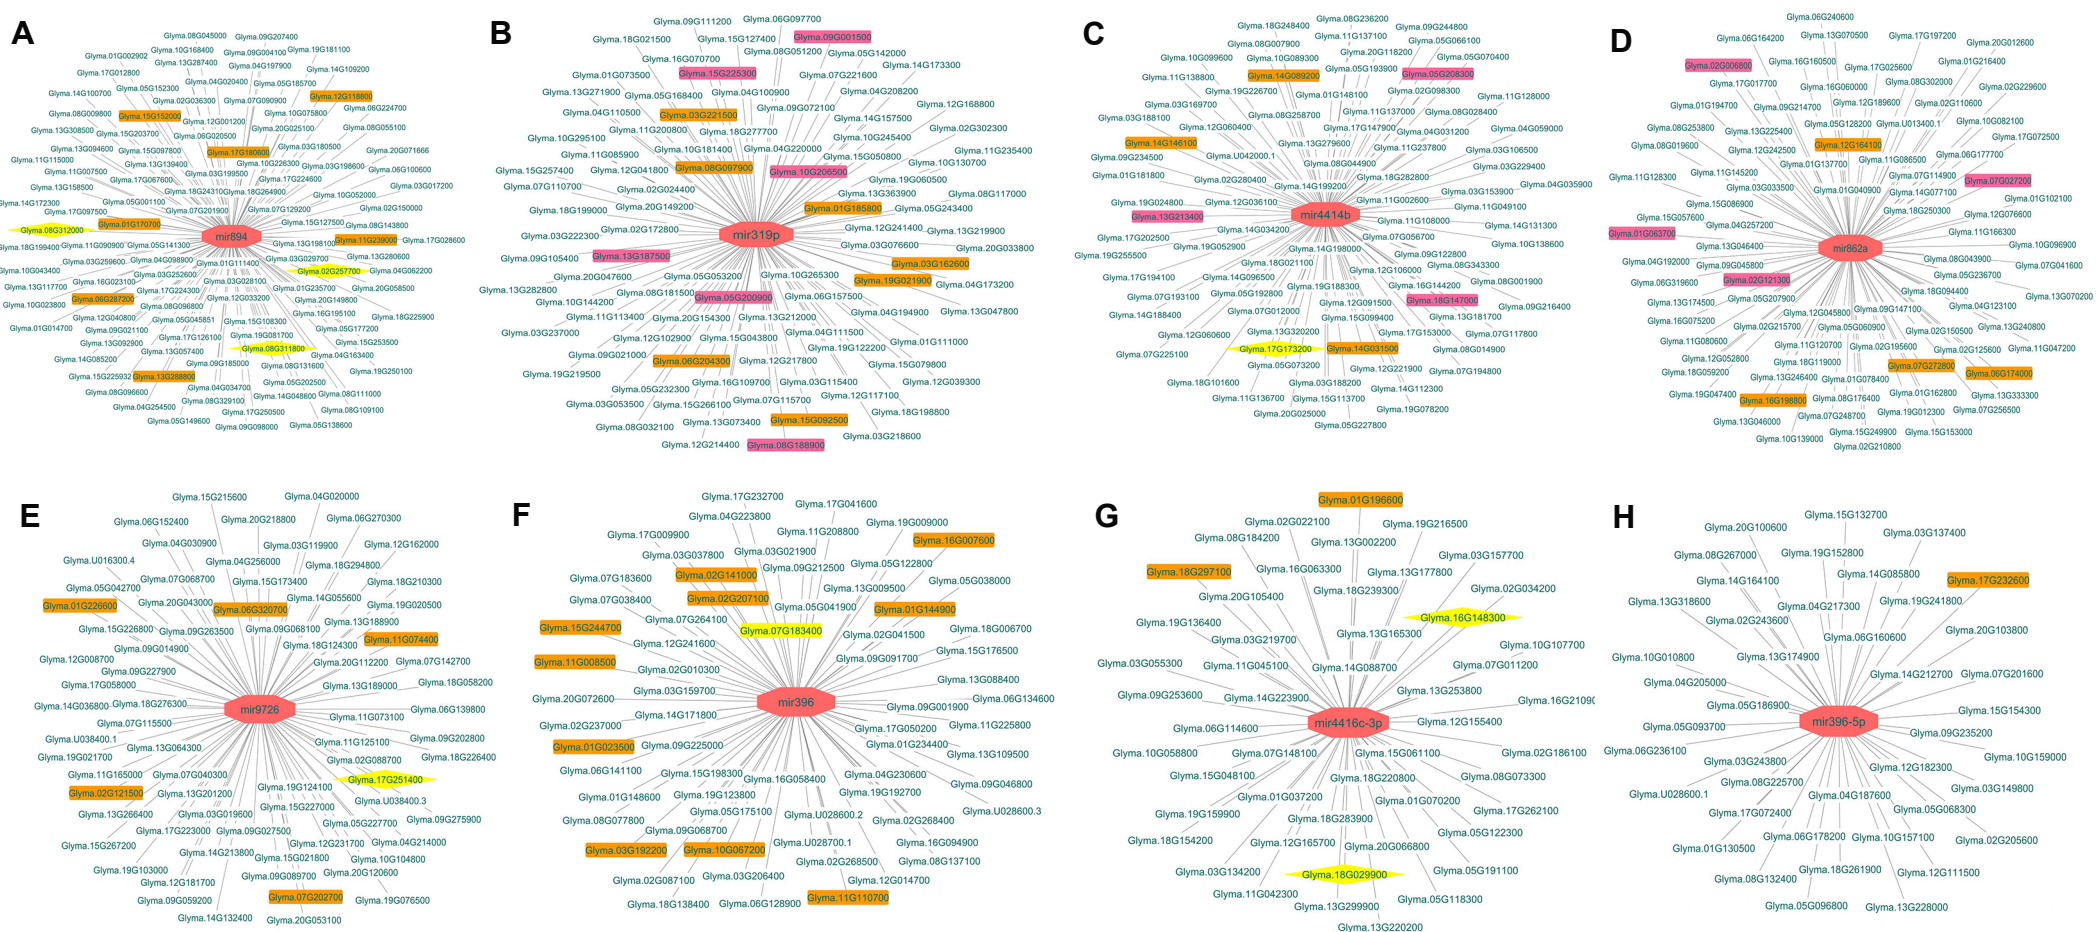

**Fig. 3** Target visualization of Differentially Expressed (DE) miRNAs in HPW and LPW lines of *P. tetragonolobus* for **A.** mir894 **B.** mir319p **C.** mir4414b **D.** mir862a **E.** mir9726 **F.** mir396 **G.** mir4416-c3p and **H.** mir396-5p. Diamond shaped pink color (node) represents the DE miRNAs and the targets were represented in edges with turquoise colored *Glycine max* Gene ID. Transcription Factors were displayed through the brown rectangular boxes, while secondary metabolites related genes were showed in pink colored boxes. The yellow colored edges are the validated targets of the corresponding miRNA (on the basis of literature).

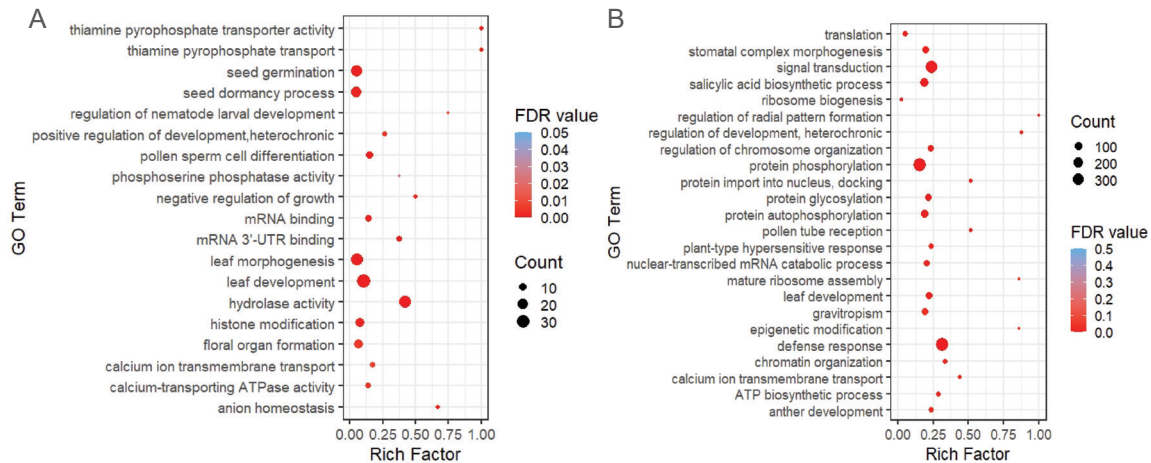

**Fig. 4** Gene ontology enrichment analyses of predicted targets of **A**. Differentially expressed conserved miRNAs and **B**. Novel miRNAs. The X-axis represents the rich factor (total number of genes/background genes) and Y-axis depicted the different GO Term. Dots were used for representing the total number of genes present in input datasets and color code represents their significant enrichment. All selected GO term are significant with the FDR Value less than 0.005.

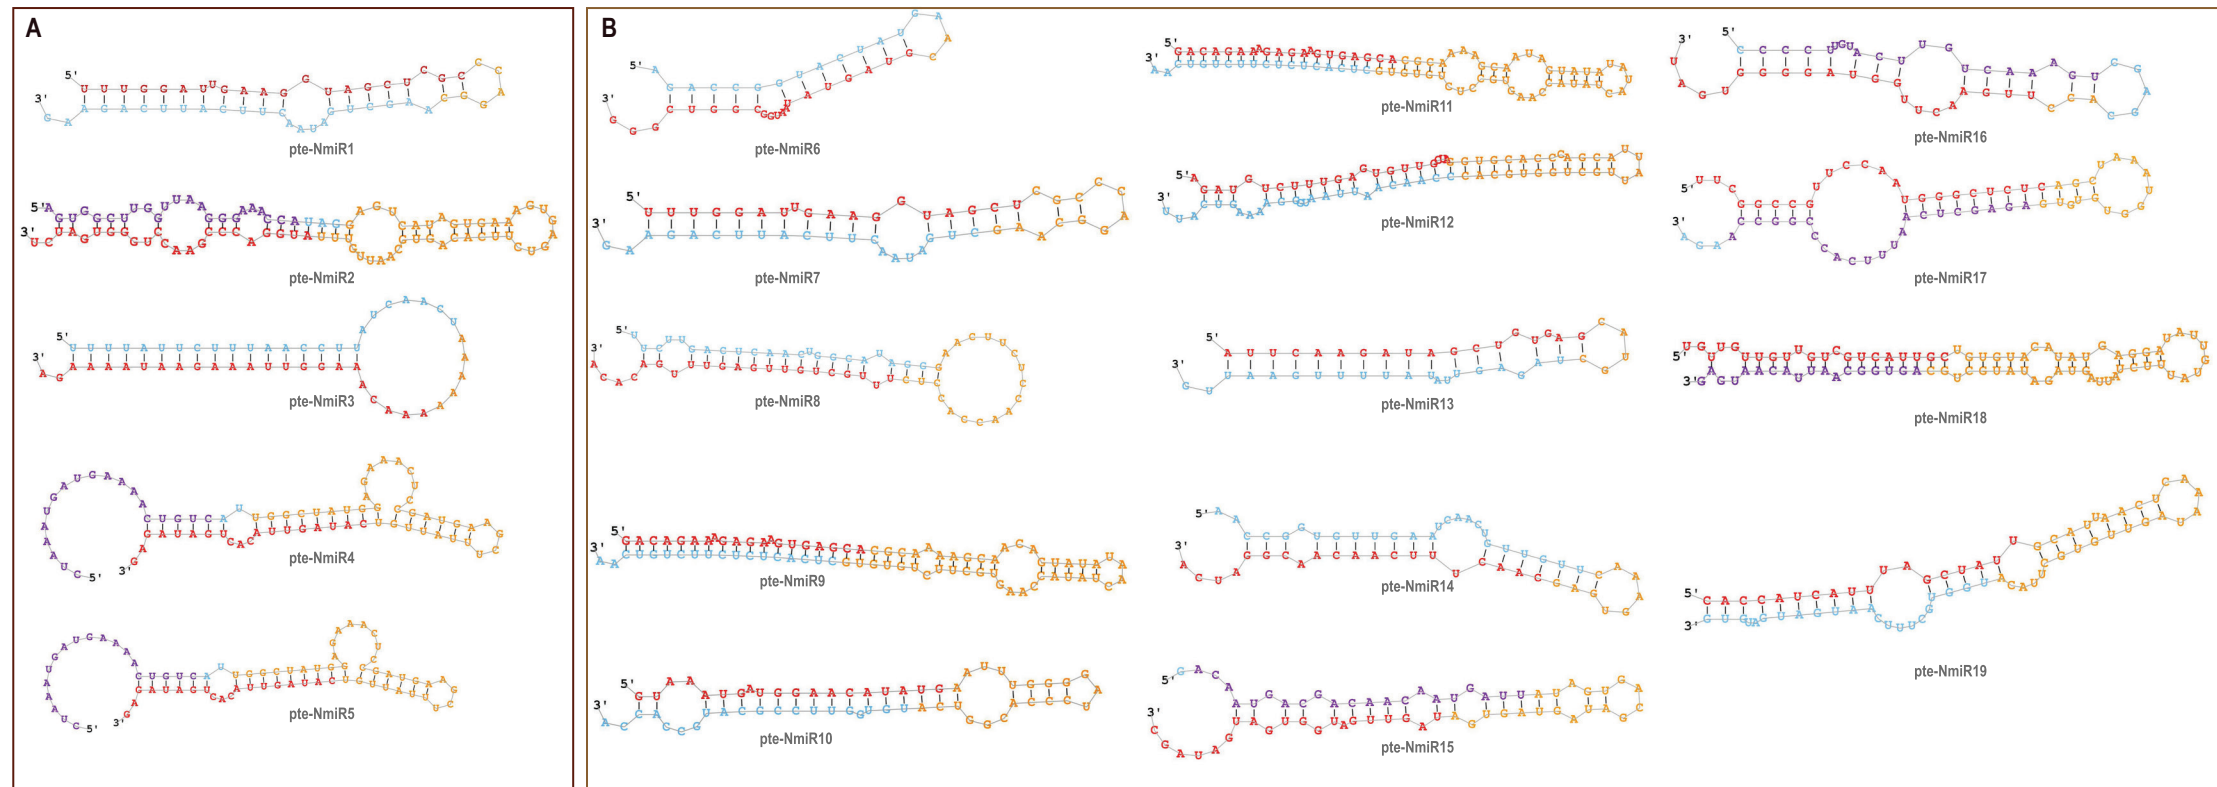

**Fig. 5** Secondary structure illustrations of predicted Novel miRNAs of *P. tetragonolobus* from the **A**. HPW and **B**. HPW sequenced Illumina library. Provisional Id was given to each predicted novel miRNAs in sequential manner with “pte-NmiR” prefixes. Star nucleotide sequences in miRNA secondary structures were represented in red in color.



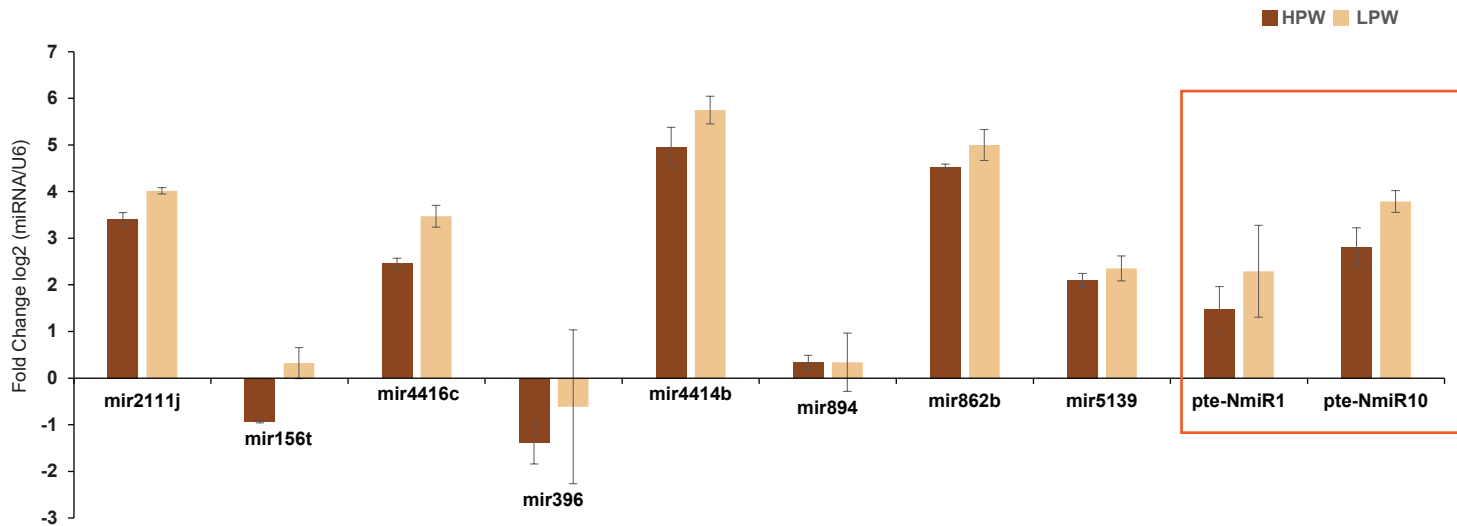

**Fig. 6** Real time Expression analyses of conserved and novel miRNAs in two contrasting lines (HPW and LPW) of *P.tetragonolobus*. The relative expression levels of the selected miRNAs were calculated using the  $2^{-\Delta\Delta CT}$  method. The U6 gene was used as a Control. Each experiment consisted of three replicates and the error bars represent the standard deviation of the mean expression values among the replicates. Novel miRNAs were enclosed in red box.

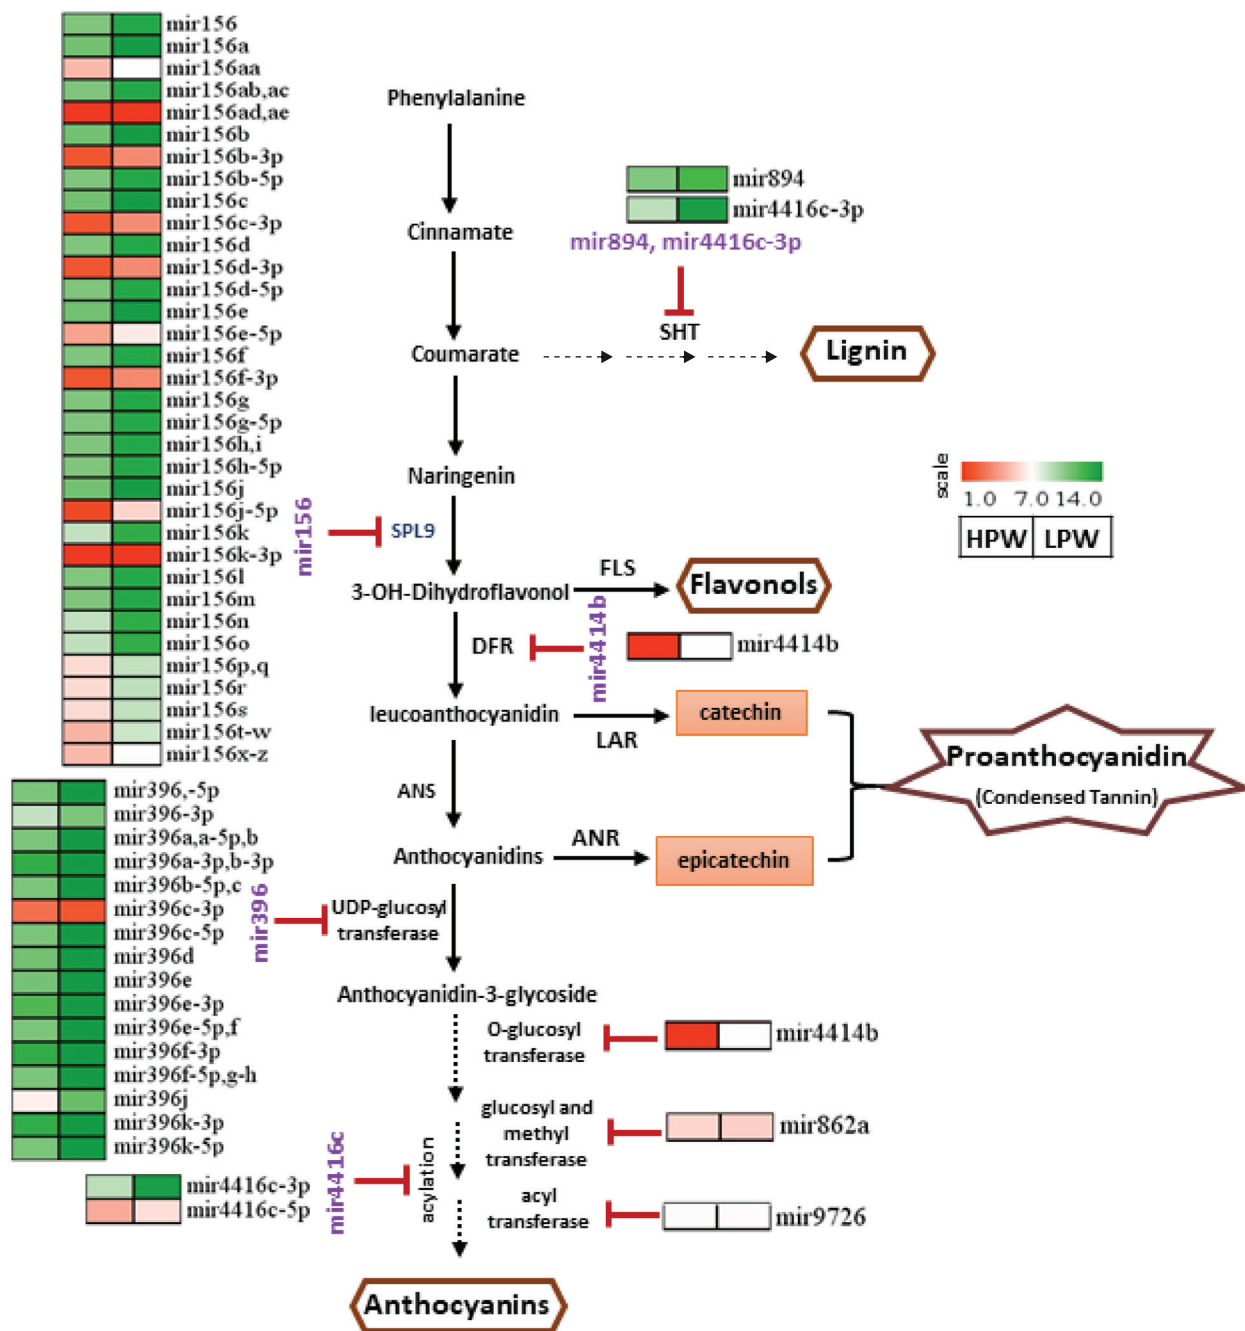

**Fig. 7** A putative model that illustrates the role of miRNAs in different proanthocyanidin content in the two contrasting line of *P. tetragonolobus*. Continuous arrow lines displayed the known pathways while break arrow showed the some missing pathway link. Red stop lines indicate the putative targets of the expressed miRNAs in the two sequenced library. The expressed miRNAs that hindering the flavonoid pathway are written in purple font color and their expression value was represented through the heatmap with the coloring scale ranging from 1 to 14. Left side and Right side expression bar was used for HPW and LPW library, respectively.

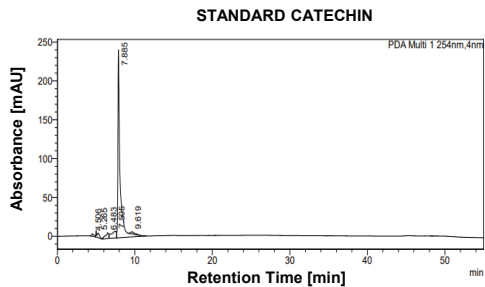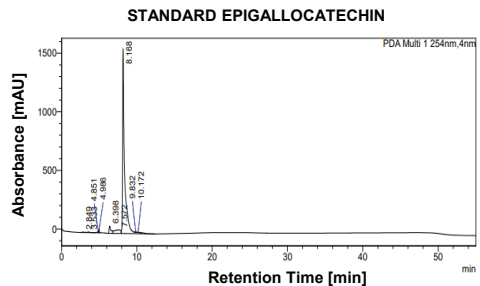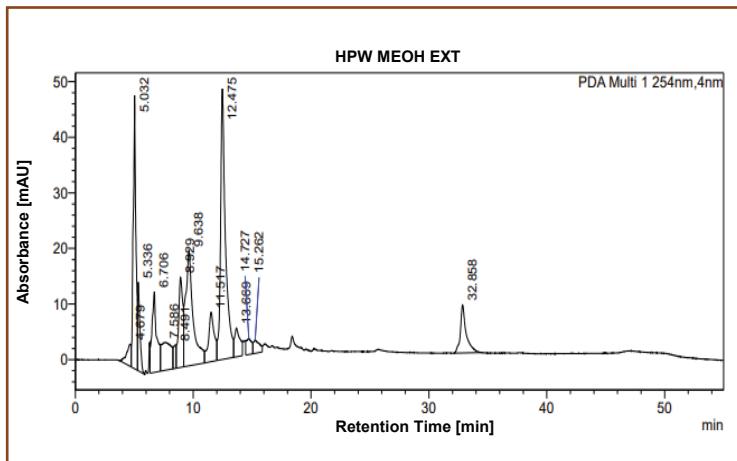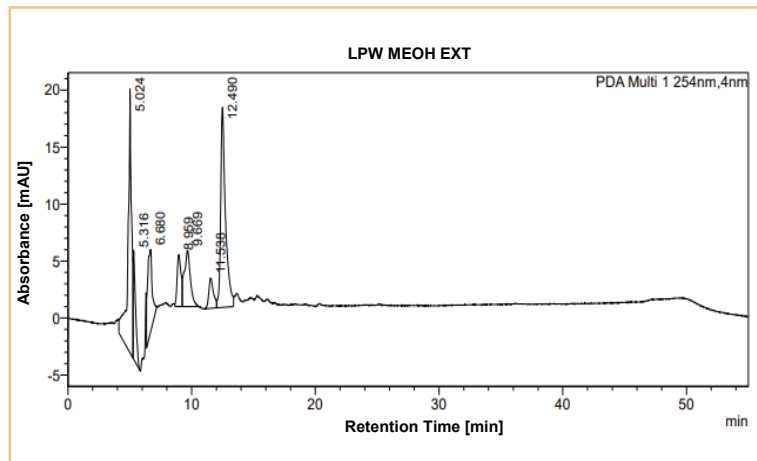

**Fig. S1** HPLC Chromatogram of standards (catechin and epigallocatechin gallate) and methanol extract of *P. tetragonolobus* leaves

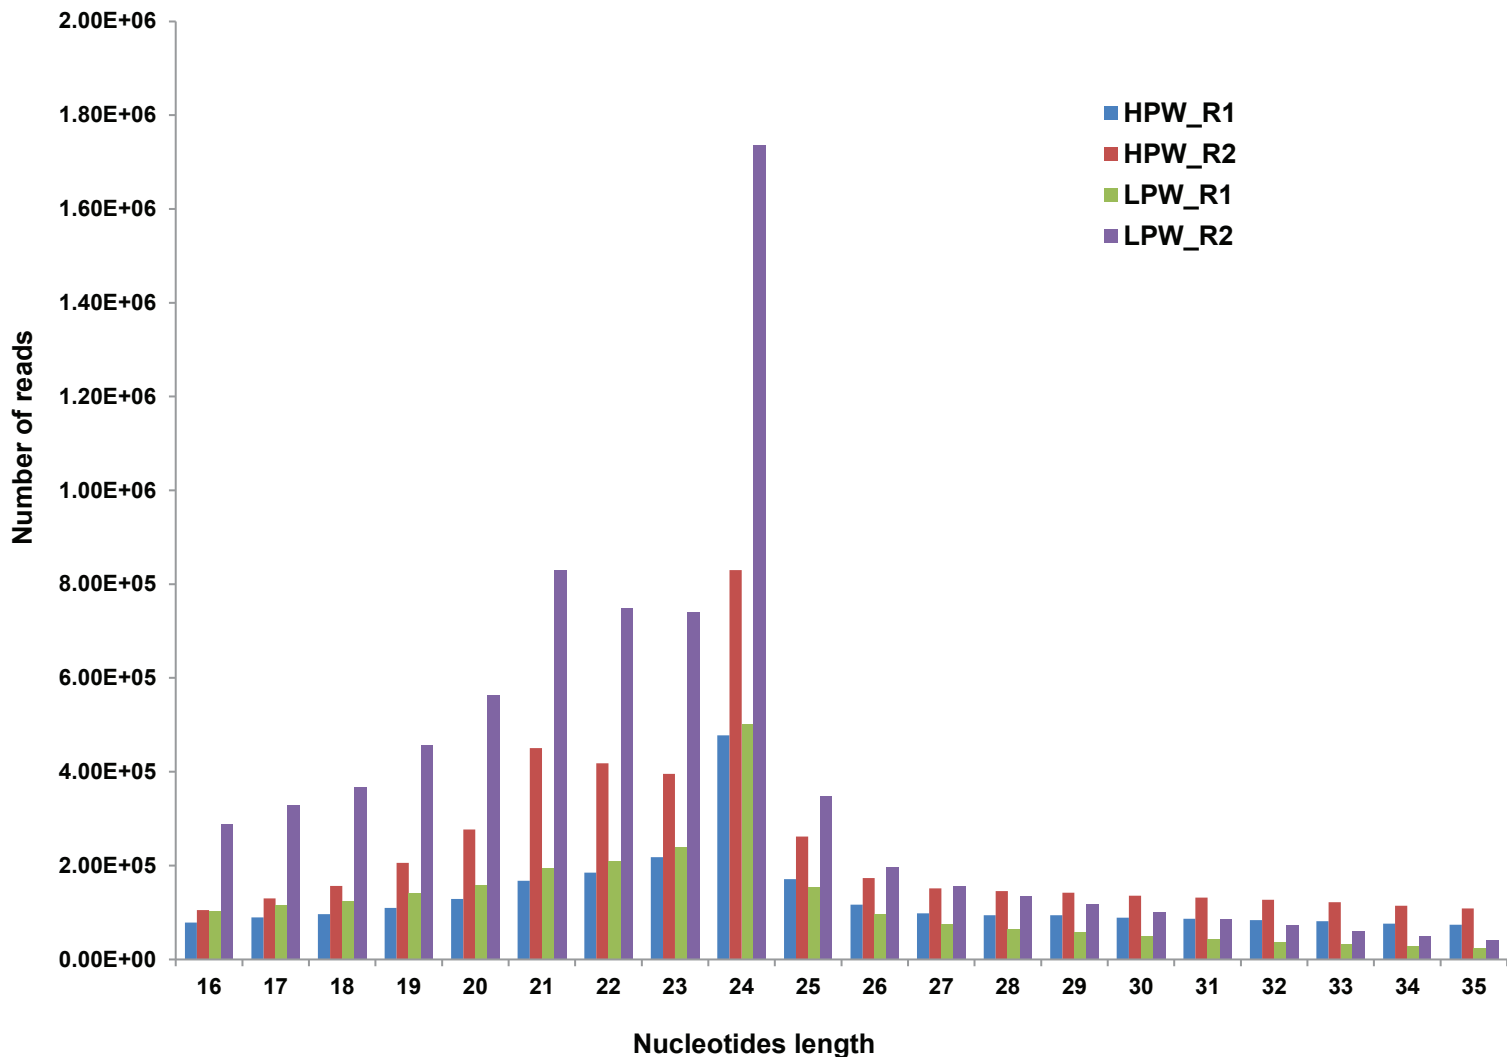

**Fig. S2** Nucleotides variation length of small mRNA in the sequenced library of HPW and LPW of *P. tetragonolobus*.





Volcano plot

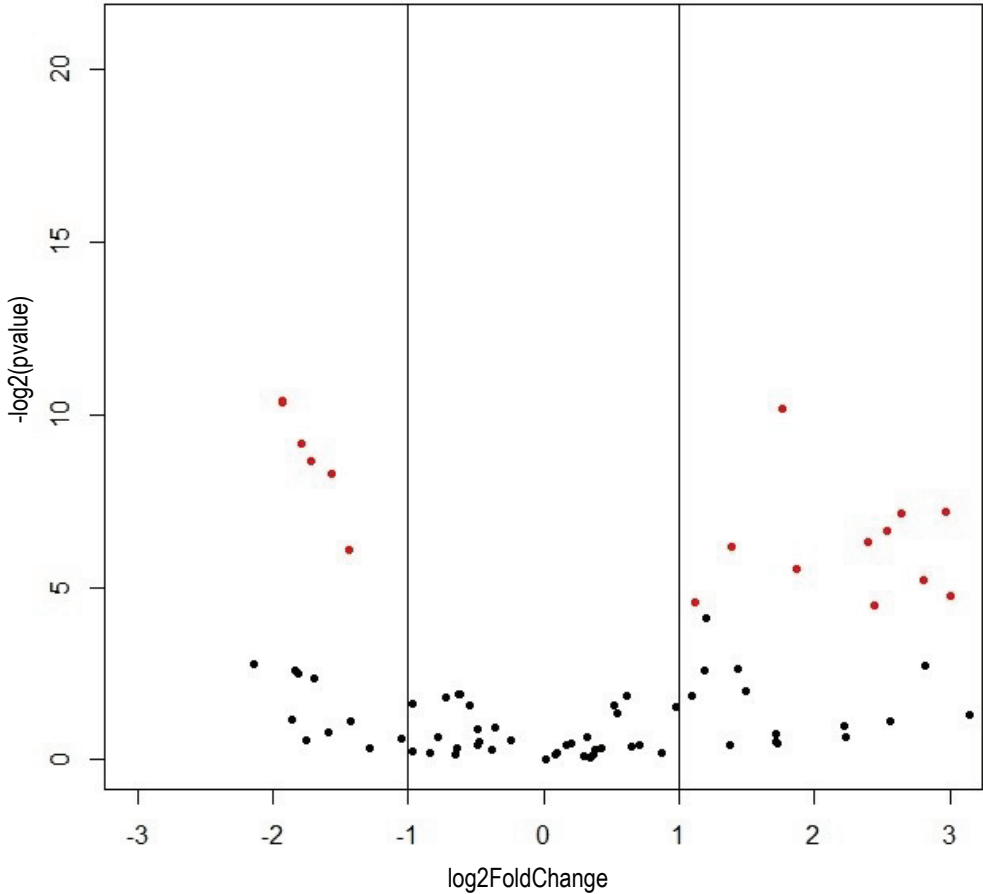

**Fig. S5** Volcano plot to represents the differentially expressed miRNAs between the HPW and LPW lines of *P. tetragonolobus*. X-axis was used for the log2Fold-change whereas Y-axis representing the  $-\log_2(\text{pValue})$ . Each dots describe the expressed miRNAs, wherein red dots define the differentially expressed miRNAs.

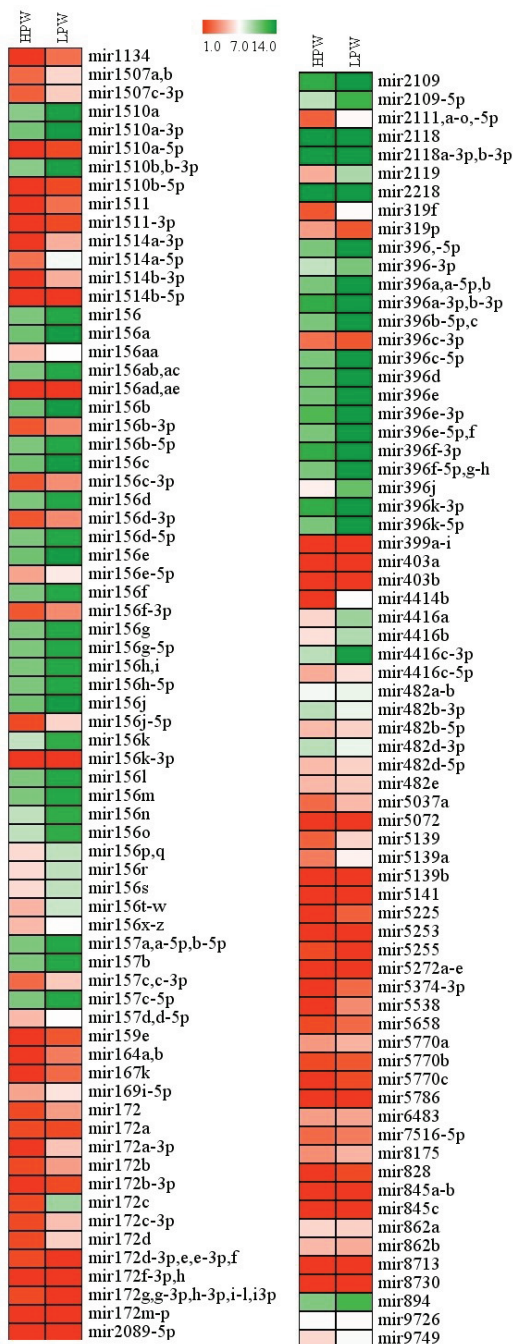

**Fig. S6** Heat map visualizations of log<sub>2</sub>fold change expression value of miRNAs from the High Proanthocyanidin Winged bean containing Line and Low Proanthocyanidin Winged bean containing Line. Lower expression value was represented in the red in color while higher expression was illustrated with green color. The color scale was ranged from 1 to 14.
